# Supplementary material for: Unique characteristics of autoantibodies targeting MET in patients with breast and lung cancer
Source: JCI journal article supplement (doi:10.1172/jci.insight.187392), 2025-05-21

**Supplementary Figure 1: MET and SEMA recombinant proteins.** (B) Protein SDS-PAGE showing recombinant MET and SEMA proteins after expression in Expi293 cells and affinity purification.

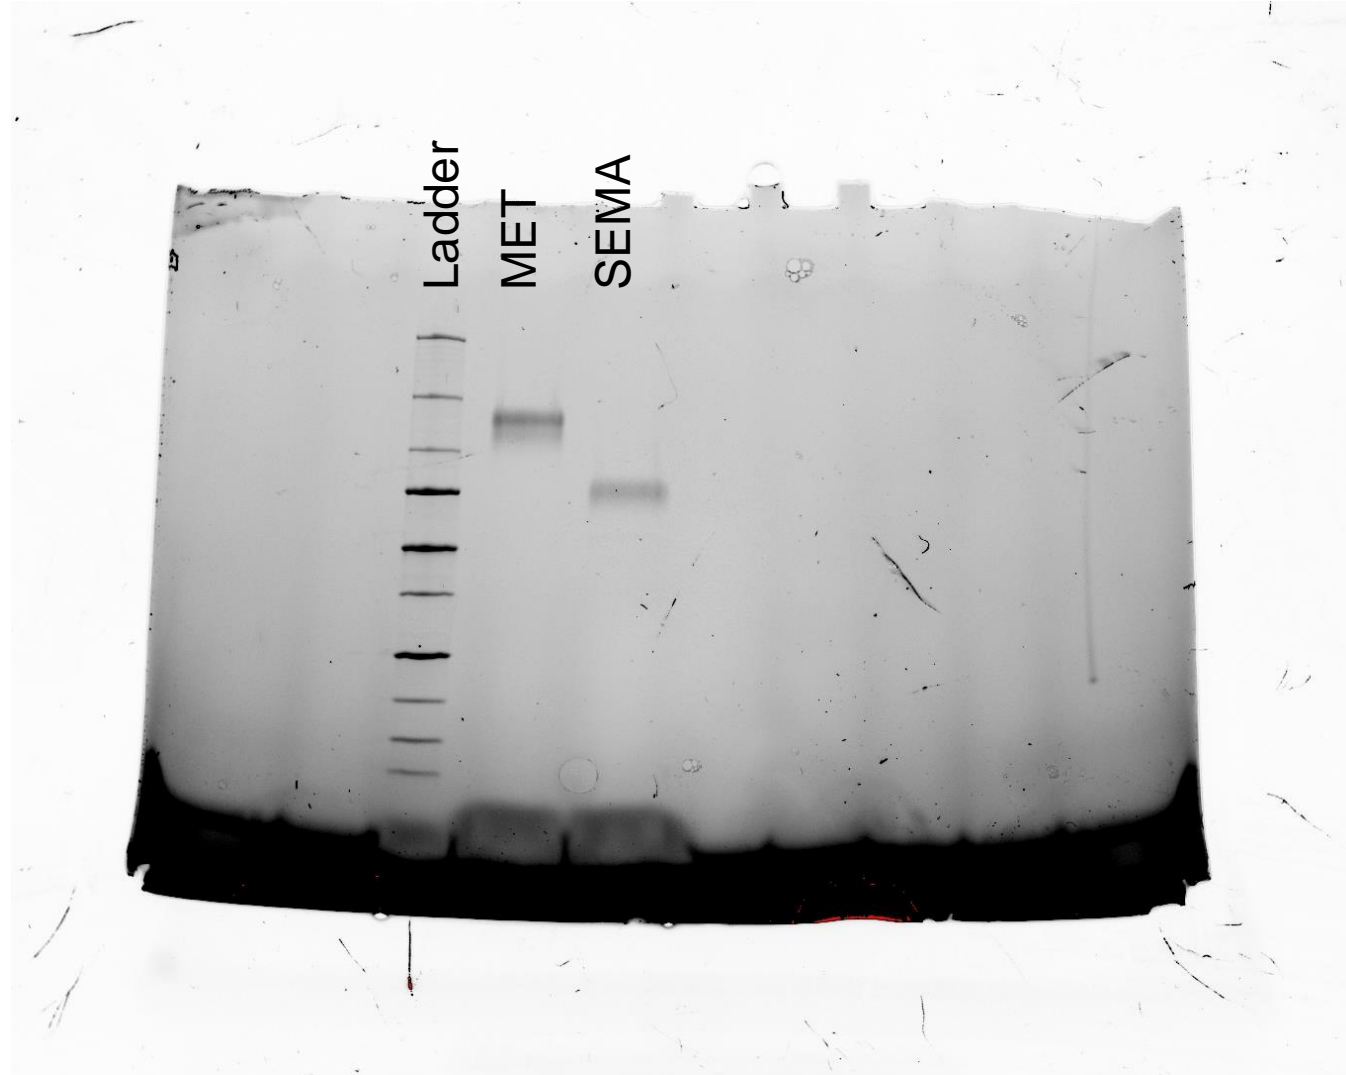

Supplement: sd2 [file 2]
